# Supplementary material
Source: HighWire-hosted journal article supplement (http://dmd.aspetjournals.org/highwire/filestream/79266/field_highwire_adjunct_files/4/453_supp_primer.pdf)
Supplement: 453_supp_primer.pdf [file 453_supp_primer.pdf]

1. mSlc3a2:

LEFT PRIMER            TTTTGGACCTCACTCCCAAC  
RIGHT PRIMER         GCCAAGTACAAGGGTGCATT

2. mSlc12a9:

LEFT PRIMER            GTGGTCGAGGAGACGAAGAG  
RIGHT PRIMER         AGGAAGGTAAGGGCTGTGGT

3. mSlc25a10

LEFT PRIMER            CAGCTGTCCTGCTATGACCA  
RIGHT PRIMER         GTCCAAGCTTTGCTGTCTCC

4. mSlc39a10

LEFT PRIMER            CTTTCCTTGCTGGGTGTGAT  
RIGHT PRIMER         CTAGCGCCACAAGTCCTTTC

5. mSlc44a5

LEFT PRIMER            CCAAGGAGGTATGACCCAGA  
RIGHT PRIMER         CCTTCTGGCCACAAAATGT

6. mSlc25a4

LEFT PRIMER            GGCCTACTTTGCTGGTAAC  
RIGHT PRIMER         ATGATGCCCTGGACAGAGAC

7. mSlc35f5

LEFT PRIMER            GGCATTGCATTTGAGGATCT  
RIGHT PRIMER         TGCTGAAGAATGGCTTGTG

8. mAbcg1

LEFT PRIMER            GAAGTGGCATCAGGGGAGTA  
RIGHT PRIMER         AAAGAAACGGGTTACATCG

9. mAtp5s

LEFT PRIMER            TGATGCCACCGATTCTTGTA  
RIGHT PRIMER         GAAATGTCGAGAGCAATGA

10. mAtp6v1e1

LEFT PRIMER            GTGCAAACGCAAAGACTGAA  
RIGHT PRIMER         CCCTTGCTCTGAGGACTTTG

11. mSlc38a4

LEFT PRIMER  
RIGHT PRIMER

CCTTGGCTACACCAGTGGAT  
TTAGGCAGCGAGATCATGTG

12. mSlc40a1

LEFT PRIMER  
RIGHT PRIMER

CCCTGCTCTGGCTGTAAAAG  
GGTGGGCTCTTGTTACATT
